# Supplementary material for: A multi-model analysis of the decadal prediction skill for the North Atlantic ocean heat content
Source: Copernicus journal article supplement (doi:10.5194/egusphere-2024-1569), 2024-06-05
Supplement: Supplementary file [file egusphere-2024-1569-AC1-supplement.pdf]

Review of the manuscript “A multi-model analysis of the decadal prediction skill for the North Atlantic ocean heat content” by Carmo-Costa et al

The study described the multi-model analysis of the decadal prediction skill for the upper ocean heat content. Authors analyze multi-model spread in prediction skill of the upper 700 m ocean heat content, further choosing the Labrador Sea and its surrounding areas, where they observe the largest model uncertainties among other regions in the North Atlantic. They further investigate the processes to clarify sources of these uncertainties and possibly improve predictions. Overall, the study is a worthy research contribution, however the manuscript needs to be further improved before publication as it currently lacks important details on the methods and description of some results; especially the NAO part is confusing. Also, some figures need improvement, so that one can follow better the conclusions that are based on them. I thus suggest major revision.

We thank the reviewer, Iulia Polkova, for her constructive comments on our manuscript. We greatly appreciate the time and effort she has invested in thoroughly reviewing our work. Her feedback has been invaluable for enhancing the quality and clarity of our paper, and we believe the revisions have significantly strengthened it.

We have meticulously addressed each of her suggestions and have provided a detailed, point-by-point response to all the comments.

Detailed comments are below.

Abstract:

1. L5-10: In the abstract, authors describe what their study intends to investigate “We analyze eight CMIP6 ... to investigate if intrinsic model characteristics ... can influence ...”. Instead of stating the aim, I suggest to summarize results of the study and whether authors’ intents were achieved by the current analysis.

Reply: The abstract has been completely rewritten as requested, with a focus on the actual findings, instead of the main goals.

2. L10-12: Last sentence only describes the historical ensembles. Basically, this is the only sentence about the results in the abstract part and it has nothing to do with decadal prediction experiments, which should be the main focus of the study according to the title. Given that the title of the paper focuses on decadal prediction skill, does this statement in the last sentence of the abstract also hold for prediction ensembles?

Reply: The statement only holds for historical simulations, that are the ones showing the largest uncertainties. This last sentence has been substantially changed in the new version of the abstract.

## Introduction:

1. L15: The exact “decades” and the exact level that has a trend need to be specified. Moreover, first two papers cited are not about warming trend in observational datasets but about reanalyses, which are not the same thing and thus need to be named correctly. Same in the second sentence (L17-19) – the papers cited are about reanalyses and not about observational datasets. Reanalyses are as much based on the observations as on the models; if they did not introduce their underlying model and assimilation method effects on the final products, we would have more coherence between different reanalyses. Thus, it is not correct to equalize them with the observational datasets.

[Reply: The first paragraph has been completely re-written and those papers are no longer cited. We have also revised the rest of the introduction to ensure that results from reanalysis products are referred to appropriately.](#)

2. L20-23: Previous paragraph described a warming trend in the North Atlantic Ocean Heat Content (NA OHC); this paragraph begins with describing cooling trend but does not specify that the cited papers speak about sea surface temperature (SST) trend in the subpolar North Atlantic (SPNA). The fact that the focus now changed from OHC to SST, needs to be specified or one has to cite the appropriate papers, which describe cooling trend in the SPNA OHC.

[Reply: We now specify that the papers describing the North Atlantic cooling trend have characterized it for sea surface temperatures. .](#)

3. L28: Specify “recent OHC variability” period. Imagine this paper will be read in 20 years from now. Will this current period description still be “recent”?

[Reply: The sentence has been rephrased to avoid this problem.](#)

4. L36: Link to Duchez et al leads to “page not found” and if it is from a newsletter, it might not be an appropriate citation. Links to cited papers need to be double-checked. I came across at least 4 of them (start with <https://doi.org/https://doi.org...>), which are leading to “page not found”.

[Reply: All the citations and their associated links have been revised in the newly submitted version.](#)

5. L58-61: This statement is not accurate. There are multiple studies from the decadal prediction community, which are cited few lines below and which show that the NA SST and the NA SPG are predictable up to decadal timescale and maybe even longer. The NA region is the one that is the most distinctive in its predictability due to initialization among all other regions on the globe. The authors basically cancel this knowledge from previous studies in this paragraph without providing any evidence. To avoid this confusion, one needs to specify the exact regions that are described in the Langehaug et al paper, where prediction systems indeed still have a lot of

troubles, namely the Norwegian Sea, the Inflow region and eastern SPG and not generalize the results of this study to the whole North Atlantic basin. By the way, the link provided to their paper is not working.

Reply: We acknowledge that the current phrasing might be misinterpreted to suggest that models rapidly lose predictive skill for North Atlantic SSTs after the first forecast year, which is incorrect. We have rewritten and streamlined the discussion on predictive skill in the North Atlantic region to ensure accuracy.

6. L64: In this context, the link to Polkova et al study should be a different one, namely: Polkova, I., Brune, S., Kadow, C., Romanova, V., Gollan, G., Baehr, J., et al. (2019). Initialization and ensemble generation for decadal climate predictions: A comparison of different methods. *Journal of Advances in Modeling Earth Systems*, 11, 149–172. <https://doi.org/10.1029/2018MS001439> This is where Polkova et al 2019 analyzed the NA SST and NA OHC skill for an “individual decadal prediction system” (as stated in L66). The paper that is cited does not fit here because in it, Polkova et al 2023 analyze the NA SPG skill from the WMO DCP ensemble of twelve CMIP models and would be more appropriate to be mentioned in L77.

Reply: We have changed the cited paper as suggested by the reviewer.

7. L88: Do authors have any evidence to state that anomaly initialization “became more popular”? E.g., in the WMO operational decadal prediction set, which relies on the CMIP6-based models, only 4 models (out of 12) use anomaly initializations. Anomaly initialization is an alternative and work-around method, it has been tested by some research groups, but there is no evidence that the method is getting more popular. One could compare and cite a change from CMIP5 to CMIP6 decadal predictions to support the statement that more systems became anomaly initialized. From my experience, I do not observe that they “become more popular”.

Reply: We did not mean to imply that anomaly initialization was more popular than full field initialization, just that it had gained some popularity. The full paragraph has been rewritten, including the discussion about anomaly and full-field initialization, which now avoids any confusion.

8. L94-101: Are those questions actually answered? Q1: has already been answered in the Introduction. Paragraph in L101-111 suddenly reduces the scope of the study from the NA skill to that in the Labrador Sea. Authors need to introduce why they focus on the Labrador Sea all of a sudden. Q2: What method is used to answer that? Q3: Name local drivers and preconditions that will be considered in the analysis. Could question part in L94-101 be combined with the content part in L101-111? Otherwise, they duplicate each other.

Reply: We have substituted the questions by a paragraph that describes the main points that are directly addressed in the manuscript.

L110: Discussion “in light of previous studies” turned out to be very thin. L380-430: 6 summary points, 4 of them mention briefly other studies without much discussion. Moreover, the 4<sup>th</sup> section (L378) is not named as Discussion anymore.

Reply: We have expanded the discussion and in particular the contextualisation of our results with other studies. We have also modified the name of the 4th section to make it consistent with this paragraph.

9. Overall the introduction part is lengthy and dissipated. Until L90 I do not know, where it is heading. Some of the description can be squeezed substantially, for instance, it is not necessary to introduce in great detail the difference between predictions and historical simulations, it has been done in many previous papers. Paragraph L57-66 states there is no skill in the NA, while the paragraphs in L68-83 try to prove the opposite. Authors need to specify earlier in the introduction, where they are going with all this, otherwise it is not clear what of this very extensive introduction about many topics is relevant for the current study. E.g., the paragraph L41-43 could be such a place. The “main aim” (L91-92) could come earlier.

Reply: We have restructured and streamlined the introduction, as suggested by the reviewer. Additionally, the main goal of the paper is now introduced earlier in the section to provide clearer guidance to the reader.

#### Methods:

1. L128: Please rephrase: Not clear what exactly the exception is with EC-Earth3. 10 members were requested and 10 members were provided; where is exception?

Reply: In the text, this refers to the historical simulations (not predictions). For EC-Earth, these experiments were conducted by various European institutions, with experiment identifiers assigned somewhat arbitrarily. The sentence clarifies that we used the 10 historical simulations run by BSC for convenience. These do not correspond to the first 10 members (e.g., r1-10) in ESGF, which served as the criterion for the other models. The text has been rephrased to improve clarity.

2. L130: “Two models contributed with fewer than 10 members to the experiments.” Contradicts the previous sentence in L124-125. If there are two exceptions, following statement does not hold: “A total of 8 AOGCMs fulfilled all the selection criteria.”

Reply: We have revised the writing to avoid the contradiction.

3. L132: Specify difference in resolution in the text.

Reply: Added ‘(0.25° and 0.4° respectively)’.

4. L136: I suggest renaming the subsection to “Verification datasets” as “three ocean reanalysis” (L138) are not “observational references” but data assimilation products - a blend of model results and observations. And adjust in the text accordingly, e.g., L150, 205, 321, etc. Also, not clear if EN4 data are actually the EN4 analysis dataset based on Optimal Interpolation. This is also not clear further on in the analysis: L137: What EN4 data are actually used, original profiles or profiles interpolated to the gridded dataset? Thus, this needs to be specified.

Reply: The subsection title was renamed to “Verification datasets” and direct mentions to observational references have been avoided. The EN4 objective analyses (optimal interpolation) were used, this has been clarified in the text.

5. L180: Is there any reason for choosing single lead years 2, 5 and 10 and not multi-year averages, which were proposed and used in previous decadal prediction studies to reduce the noise in the calculation of the prediction skill?

Reply: We preferred to keep individual lead years for simplicity as the goal was not to maximize skill by averaging out some of the unpredictable noise but to assess how the skill changes with forecast time. We also wanted to keep a parallelism with the analyses in Costa-Carmo et al 2022, which also focused on individual forecast years.

6. Why Table 1 does not contain information about the atmospheric model and atmosphere initialization as it is probably relevant for the NAO part of the study?

Reply: We have not included information about atmospheric initialization because it has limited relevance in decadal prediction, as the atmosphere does not contribute predictability beyond approximately two weeks. For instance, some decadal prediction systems, such as CESM, do not even initialize the atmosphere with observed states (Yeager et al., 2018). Instead, it is the ocean—and its initialization—that provides the primary source of predictability for the NAO at seasonal to multi-annual timescales.

Reference:

*Yeager, S. G., and Coauthors, 2018: Predicting Near-Term Changes in the Earth System: A Large Ensemble of Initialized Decadal Prediction Simulations Using the Community Earth System Model. Bull. Amer. Meteor. Soc., 99, 1867–1886, <https://doi.org/10.1175/BAMS-D-17-0098.1>.*

Results:

1. L190: “This initial skill loss might ...” Some disconnect with the previous sentence, which speaks about increased skill. MPI-ESM model shows also increase of skill in the LS. Overall, this improvement seems to look very minor. To provide a quantitative estimate of improvement/loss of skill, the authors could provide percentage of grid-cells in the region that shows higher/lower skill?

Reply: We have rephrased the text for clarity. We do not mention MPI-ESM in this context because the increase of skill with FY is only visible in the western side of the Labrador Sea box, with the eastern side showing instead a decrease in skill.

2. L191: From the figure, it does not look like “historical ensembles show comparatively higher ACC values than the DCPD at FY2“. Vice versa historical simulations have a larger area of „no skill“. Some models have higher correlation in the eastern NA in HIST, but again only some. To support the statement in L191, the map of the skill score or correlation difference with the significance level should be provided – that is a standard plot in similar intercomparison studies.

Reply: With that statement we referred only to models IPSL-CM6A-LR and CanESM5, the only ones for which it is actually true. We have rephrased the text to make that clearer. As suggested, we have also added the maps of the differences in correlation between the DCP and HIST ensembles (new Figure A2), which nicely supports our statement, further illustrating how initialization is largely beneficial for the predictive skill, not only in the Labrador Sea but also in the wider North Atlantic Subpolar Gyre region.

3. L192: Suggest to change “it seems to reflect” to “it might reflect ... the issue that has already been reported by ...”.

Reply: Done.

4. Figure 2: the color palette is a bit unfortunate: The ranges 0.1-0.3 and 0.3-0.5 are hardly distinguishable. The range 0.6-1 is not in use.

Reply: The color palette has been modified to improve visibility.

5. Figure 3: is not very informative. The arguments in paragraph (L210-215) about “cooling trends” and any “multi-annual modulations” are difficult to recognize and follow from this figure (L210-219). L210-211: Is this a trend or multi-annual variability? L217: Is the “evolution flat” or the figure is flat? Maybe a different position of the panels, which does not stretch the timeseries, could help to better transfer the message of the authors. Also, one could normalize timeseries and use the original figure in the supplementary.

Reply: We have redone the figures modifying their aspect ratio to improve the visibility of the trends. We have also rephrased the text which now avoids any general reference to multi-year variations.

6. L226: Please elaborate in the text: what does “(1) an unforced origin for the observed trend” mean?

Reply: The text has been expanded to make it more clear.

7. Figure 5: Residual correlation as in Smith et al 2019 <https://doi.org/10.1038/s41612-019-0071-y> might be more appropriate to separate skill due to internal variability and external forcing.

Reply: An important drawback of residual correlations is that they are only valid if the models represent the forced response correctly, and this might not hold in some regions where the HIST simulations show large disparities. We have introduced them (new Figure A3) in the context of the global maps of ACC skill, to see if they yield consistent results with new Figure A2, which displays the ACC differences between the DCP and HIST ensembles. Interestingly, both figures highlight the Subpolar North Atlantic as the region that benefits the most from initialization. Residual correlations additionally identify the Eastern North Atlantic as another region with added value of initialization, but this result needs to be taken with caution as it is also the region with the largest ACC inter-model differences in the HIST ensemble.

8. L238: Or there are cancelling signals in the box that is analyzed, as it also includes Irminger Current and part of the North Atlantic Current in that box. From Figure 1, it follows that apart from one model, all historical experiments have skill in the Labrador Sea.

Reply: We now mention this possibility in the text.

9. L257: What is the difference between “the local OHC skill and ultimately their forecast skill”? Please elaborate in the text.

Reply: The text has been rephrased.

10. Figure 6: Why are there two times “depth” labels on the y-axis?

Reply: Corrected.

11. L294, 298-303: Can one compare Figures 7 and 8? They seem to show different things: Figure 7 shows ensemble spread and Figure 8 shows shifts of action centers with lead year. Is Figure 8 plotted based on the ensemble mean or also on based on the ensemble members as Figure 7?

Reply: They provide complementary information, so any comparison between them should be done with caution. As the reviewer correctly says, crosses in Figure 7 indicate intra-ensemble consistency in the historical runs, while in Figure 8 the circles indicate differences across forecast times in the predictions, in this case for their respective ensemble means. That is why we decided to use different symbols in each case (i.e. crosses and circles). We have amended the text and the caption of Figure 8 to make this more clear.

12. L303-306: Confusing conclusion about “centres of action appear to be unaffected by the forecast drift”. Has Figure 8 been diagnosed based on the drift? But even then, Figures 7 and 8 still represent different things (ensemble spread vs. drift). Or does Figure 8 reflect temporal evolution + drift, then speaking about drift is not appropriate at all?

Reply: We acknowledge that this sentence was imprecise. The forecast drift (as characterized by the lead time dependent climatology) has been removed prior to the computation of the EOFs that describe the centers of action. What we meant to say is that the centers of action do not seem to change with forecast time. The text has been rewritten for clarity.

13. L304: “full-field initialization does not correct the position of the simulated centers of action in models” What is the physical mechanism by which ocean initialization should correct NAO centers of action? The original hypothesis was that the NAO drives the LS variability and not the other way around. Why is atmospheric initialization not mentioned here, as these prediction systems are also initialized in the atmosphere? Also, this conclusion (L304-306) cannot be made because DCPs are not compared here with respect to the original data that have been assimilated into the respective prediction systems. Pay attention that all of these systems are

initialized from different datasets and with different assimilation/initialization methods, and not necessarily from the verification dataset that is used here. Earlier authors mentioned that ERA5 has its centers also close “to the East” (L299), CMCC-CM2-SR5 is initialized in the atmosphere with ERA-Interim and ERA5. If this is how the CMCC-model wants the centers of action to be (in HIST) and how initialization suggests (ERA-reanalyses), so why should they be located somewhere else?

Reply: We respectfully disagree with the reviewer on this point. The NAO is not solely a driver of North Atlantic Ocean variability; it also responds to changes in the North Atlantic SST patterns (e.g., Gastineau & Frankignoul 2015). These SST patterns are expected to be corrected through full-field initialization. As already addressed in our response to point 6 for the methods section, the atmospheric initialization is less critical in this context, as the forecast times considered in our analysis are long enough for the atmospheric state to be predominantly shaped by the underlying ocean state, which has significantly more persistence. For this reason, we also maintain that our conclusion is justified even though we use a common dataset for verification (i.e., ERA5) that differs from the datasets employed for initialization in the prediction systems. We chose ERA5 because it is widely regarded as one of the most reliable and comprehensive atmospheric reanalyses, providing our best estimate of past NAO variability. Our primary goal is to evaluate which models most accurately represent the NAO centers of action and whether they change with forecast time, rather than assessing how closely the models retain their initialized atmospheric state. We believe this approach allows us to robustly identify strengths and weaknesses in how the prediction systems simulate the NAO dynamics, independent of the specific details of their initialization datasets or methods.

Reference:

*Gastineau, G., and C. Frankignoul, 2015: Influence of the North Atlantic SST Variability on the Atmospheric Circulation during the Twentieth Century. J. Climate, 28, 1396–1416, <https://doi.org/10.1175/JCLI-D-14-00424.1>.*

14. L321: Specify which observations are meant here, or is it ERA5 reanalysis?

Reply: We meant ERA5. This is not specified in the text.

15. L324: I am missing the bridge in this analysis between ocean initialization based on „full-field initialization“ and „more realistic forcing of the NAO“. There is no word about atmospheric initialization, more curiously, it is not even mentioned in Table 1.

Reply: Full-field initialization in the ocean helps to simulate a more realistic forcing of the NAO on the OHC by imposing a more accurate stratification, which then enables the local mixing to respond more appropriately to the atmospheric forcing associated with the NAO. We have rephrased the text to indicate this more clearly. Also, as noted in our responses to other comments, atmospheric initialization is not considered relevant in this context, as decadal predictability is determined by the more persistent oceanic state rather than the transient atmospheric state.



16. Figure 11. Caption text about the sensitivity of the stratification should be in the main text not in the caption. Instead, the range can be explained in the caption, with 0 value meaning less stratified and 1.5 - more stratified or so. In the legend the green star is not filled, what does this mean? I suggest another sensitivity test with the box confined only to the LS as e.g., in Menary et al 2016 <https://doi.org/10.1002/2016GL070906>, because in the very first figure almost all the models have skill in the LS. Thus, this analysis in Figure 11 contradicts Figure 1 with now half of the models suggested to not have skill in the LS. Same region, as in this study, in Hermanson et al 2014 <https://doi.org/10.1002/2014GL060420> termed as western part of the SPG. Maybe authors need to reconsider naming the region as "LS" or recalculate the analysis for a smaller region that focuses only on the LS.

Reply: The part about the sensitivity to the index definition has been moved to the text and the interpretation of the index has been included in the caption, as suggested. Also, the green star in the legend has been filled, it was an oversight. We now also explicitly mention when the LS box is defined that the selected region extends into the Irminger, and that other studies have termed this whole area as the western SPG. We chose to maintain this larger area for our analysis because Figure 2 nicely illustrates that it is the entire region that exhibits significant inter-model differences, and not just its western side. Regarding the final point, we believe there is no contradiction between Figures 1 and 11, provided the region represented by the LS box is clearly defined, as it is now. Specifically, having skill in the western portion of the LS box does not imply that the whole region is predictable. For instance, the HIST ensembles for the CMCC, HadGEM, and MRI models display negative skill in the eastern side of the box, which accounts for their low ACC values in Figure 11.

17. L360: "In models that have stronger climatological surface heat fluxes in the LS". Name those models.

Reply: Done.

18. L360-363: The sentence is not clear. The ACC in the NorCPM is highly anti-correlated with the EN4, likely suggesting the opposite trend (as follows from Figure 3). What does this has to do with the " lower percentage of the observed OHC700 variance"? There are too many indirect interpretations in the last paragraphs of the result section. Please make sure to refer to figures and analysis, so that the reader can follow authors' line of thoughts.

Reply: We have rephrased the text for clarity.

19. L375, L410: In Figure 11, the multi-model mean ACC value is less than 0.5, the multi-model seems to have 0.4, which means even less variance explained than claimed in the study (25%). MRI model has the skill of 0.5.

Reply: The reviewer is right. We have corrected the numbers in the text.

Conclusions and Final Remarks

1. L383: From where does this follow that the observational uncertainties in the Labrador Sea are low?

Reply: From Figure A1, that shows that 4 different observation/reanalysis datasets are highly correlated with each other in that region. This was also previously mentioned in lines 203-206 of the previous manuscript.

2. L390: Subpolar North Atlantic is not the region where models do not show skill in Figure 1. SPG is usually defined from 45N (or 50N) northward, while the region where the ACC has negative values in this analysis already starts at 30N (or 35N) in most of the models. It is more the region of the Gulf Stream path and the Gulf Stream separation in many models. It would be more meaningful to specify the coordinates, latitudinal bands, etc., rather than naming regions incorrectly.

Reply: We referred to that region as the Central Subpolar North Atlantic to align with the terminology used in Carmo-Costa et al. (2022), where the negative values unequivocally occurred in that area. However, we acknowledge that in this multi-model analysis, such a definition is less precise because the location of negative ACC values varies significantly across models. We have revised the text to describe the region as being located east of the Grand Banks, which more broadly applies to all the models in this analysis.

3. L391: „It is unclear how much of this low skill is due to the large local observational uncertainties.“ What is exactly meant by this sentence? That the verification dataset is uncertain and so is the skill estimate, or that the initial conditions are uncertain and thus predictions diverge too much from the true initial state? All of this might hold and not only that; model biases, initialization issues and limits of predictability are also reasons for low prediction skill. E.g., in seasonal predictions, deficiencies in predicting position of the jet stream in the atmosphere is an issue; we have the same thing in the ocean in decadal predictions, with the current's pathways (Gulf Stream separation and pathway). In this respect, it is not clear to me, why only this one reason (“local observational uncertainties”) that limits skill is mentioned in the summary.

Reply: We intended to convey that uncertainties in the observational data used for verification in this region prevent us from accurately determining the true predictive skill. However, the reviewer is correct that these observational uncertainties, which are particularly large in this region (as shown in Figure A1), most likely also affect the quality of the initial conditions, further influencing the region's predictability. We have now stated both points in the text. Regarding the other factors mentioned (e.g., model biases, initialization issues, and predictability limits), while they are valid and relevant to prediction skill in general, they are not unique to this region. For this reason, we have chosen not to include them in this specific case.

4. L399: “using multi-model approaches” for what purpose exactly? Operational climate predictions are carried out at national centers with a single model. From Figure 5, most of the models have decadal prediction skill that is higher than that of the historical simulations (L397-398). The skill score for Figure 1 could show the

quantitative difference between initialized and uninitialized simulations. As it is now, the conclusion is not convincing.

Reply: This was not a recommendation for operational centers in particular, but for climate prediction research in general. Drawing conclusions from individual models can sometimes lead to equivocal interpretations. This underscores the importance of initiatives like DCP, which were designed to explore predictability and its drivers across multiple models, allowing for an evaluation of their consistency—or lack thereof. Our analysis of the contribution of external forcings to Labrador Sea OHC predictability exemplifies this need. Regarding Figure 5, while it is true that most models exhibit higher skill in the DCP ensemble compared to the HIST ensemble, this difference is neither consistently significant across models nor uniform in magnitude. That is why we conclude that the added predictive value of initialization, reflected in the difference in skill between DCP and HIST, varies across models—a conclusion we consider robust.

5. L405: Consider this paper for discussion by Hegerl et al 2021 <https://doi.org/10.3389/fclim.2021.678109> showing that models that simulate a more realistic SPG stratification show higher SST prediction skill than those that simulate less realistic stratification.

Reply: Thanks for the reference. We now discuss it in the text.

6. L413: Some models are initialized only in the ocean (e.g., NorCPM), others are also initialized in the atmosphere (e.g., HadGem3). Information about this is not mentioned in the manuscript. How does this difference (initializing or not initializing atmosphere, full field vs anomaly) across models affects or could affect their performance?

Reply: As we have explained in the response to other previous comments the initialization of the atmosphere is not expected to have an important influence on the decadal predictive skill due to the very short memory of the atmosphere compared to the ocean.

7. L420-421: From Figure 1, it does not follow that MPI-ESM model is the among best performing “in the whole North Atlantic”, its skill is way less than in other models.

Reply: We have revised the text to clarify that neither of the two high-resolution models exhibit superior performance in terms of predictive skill compared to the other models.

---

Minor:

1. L29: Rephrase “help overcome”

Reply: Done.

2. L81: “and” not “or”.

Reply: Modified as requested.

3. L211: Some problem with a sentence.

Reply: We have rephrased the sentence.

4. L348: "Understanding uncertainties and predictability in the externally forced LS OHC700"

Reply: We have kept our phrasing that we find to be more precise.

5. L360: "(Figure 11c)"

Reply: Done.

6. L390: "negative skill" not "negative skill score". No "skill scores" have been shown in the manuscript.

Reply: Done.

7. L393: "inter-model differences in terms of the skill spread". It is necessary to be precise about what differences are meant.

Reply: Done.
